# Supplementary figures and images for: Nonlinear circuits for naturalistic visual motion estimation
Source: eLife journal article supplement (doi:10.7554/elife.09123), 2015-10-24

**a**

natural contrasts

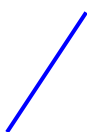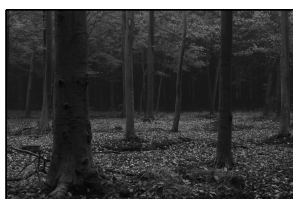

equalized contrasts

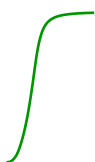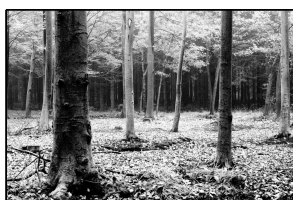

binarized contrasts

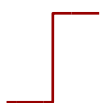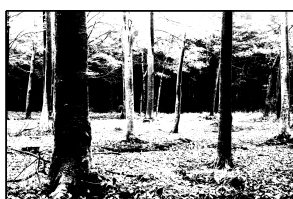

**b**

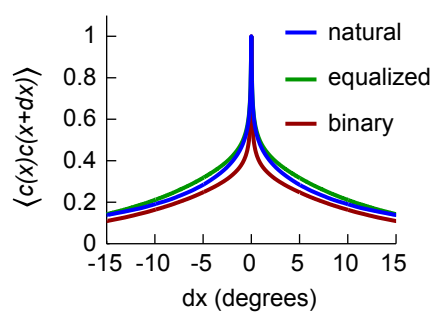

Supplement: supp [file elife_poa_e09123_Figure_2_figure_supplement_1.pdf › elife_poa_e09123_Figure_2_figure_supplement_1.pdf]

**a**

|        | ++   | +-   | -+   | --   |
|--------|------|------|------|------|
| even=2 | +1/4 | +1/4 | +1/4 | +1/4 |
| odd    | +1/4 | +1/4 | -1/4 | -1/4 |
| odd*   | +1/4 | -1/4 | +1/4 | -1/4 |
| even>2 | +1/4 | -1/4 | -1/4 | +1/4 |

**b**

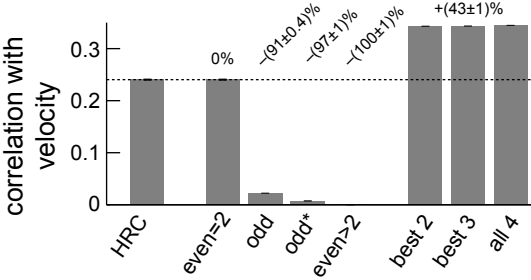

Supplement: supp [file elife_poa_e09123_Figure_3_figure_supplement_1.pdf › elife_poa_e09123_Figure_3_figure_supplement_1.pdf]

**a**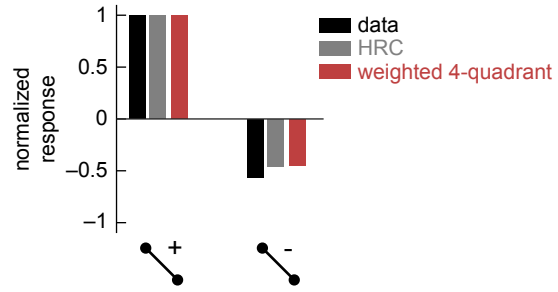**b**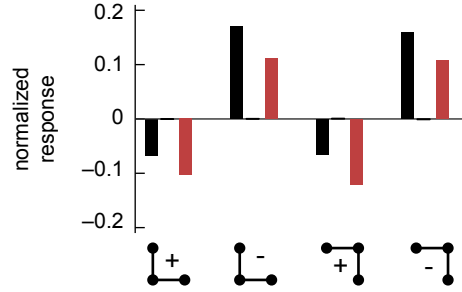

Supplement: supp [file elife_poa_e09123_Figure_3_figure_supplement_2.pdf › elife_poa_e09123_Figure_3_figure_supplement_2.pdf]

**a**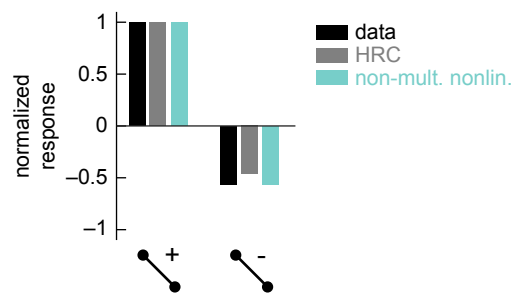**b**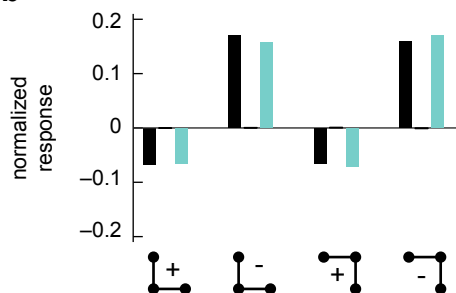

Supplement: supp [file elife_poa_e09123_Figure_4_figure_supplement_1.pdf › elife_poa_e09123_Figure_4_figure_supplement_1.pdf]

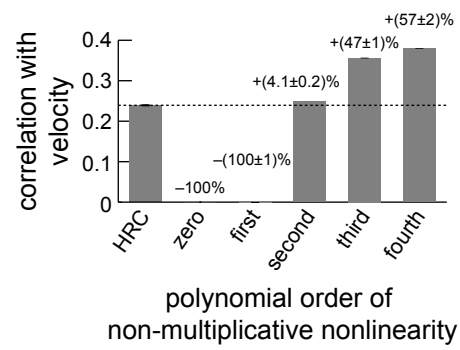

Supplement: supp [file elife_poa_e09123_Figure_4_figure_supplement_2.pdf › elife_poa_e09123_Figure_4_figure_supplement_2.pdf]

**a**

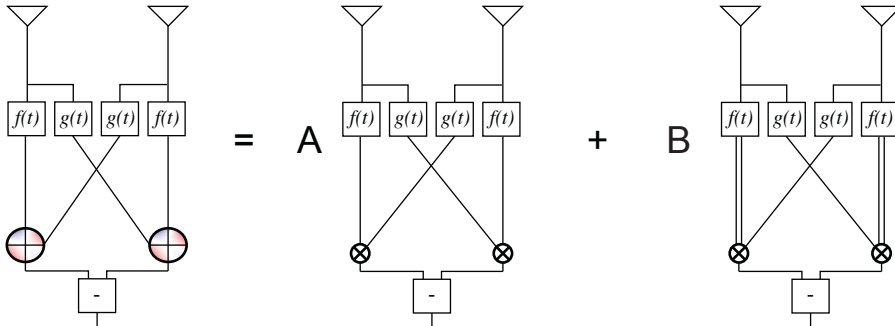

**b**

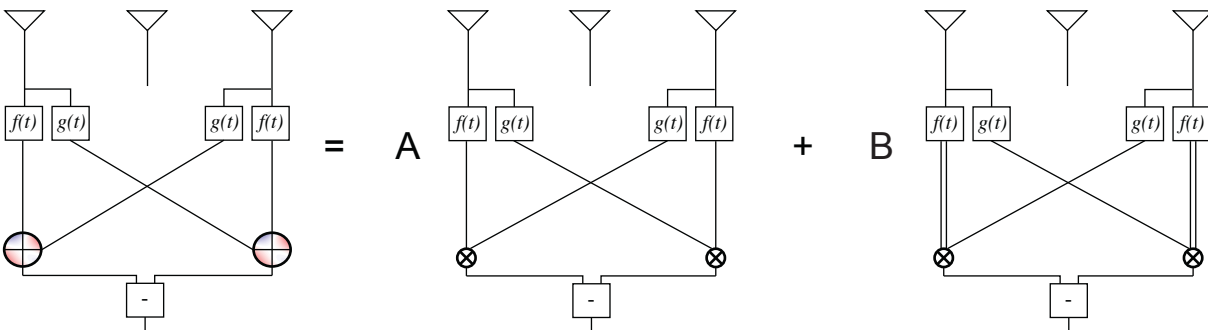

**c**

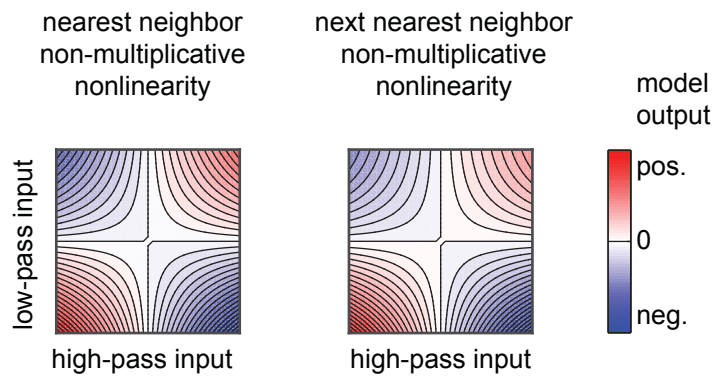

Supplement: supp [file elife_poa_e09123_Figure_5_figure_supplement_1.pdf › elife_poa_e09123_Figure_5_figure_supplement_1.pdf]
